# Supplementary material for: Identification of Important Nodes in Directed Biological Networks: A Network Motif Approach
Source: PubMed Central journal article supplement (PMC4149525; doi:10.1371/journal.pone.0106132), 2014-08-29
Supplement: pone.0106132.s001.pdf [file pone.0106132.s001.pdf]

**Table S1: Clusters, members, rankings and statistical characteristics of the identified top-30 ranked nodes in the DDT.**

| Group | Node | $I^{\text{score}}$ | Out-deg. | $R_{\text{out}}$ | In-deg. | $R_{\text{in}}$ | $R_{\text{total}}$ | $R_{\text{p}}$ | $R_{\text{mc}}$ | $R_{\text{bet}}$ |
|-------|------|--------------------|----------|------------------|---------|-----------------|--------------------|----------------|-----------------|------------------|
| $G_1$ | 1    | 20.01              | 15       | 3                | 4       | 9               | 5                  | 7              | 1               | 23               |
|       | 6    | 19.57              | 17       | 1                | 3       | 10              | 4                  | 2              | 1               | 28               |
|       | 18   | 17.37              | 9        | 6                | 15      | 1               | 2                  | 14             | 2               | 2                |
| $G_2$ | 26   | 13.57              | 8        | 7                | 7       | 6               | 8                  | 16             | 3               | 15               |
|       | 13   | 12.69              | 10       | 5                | 8       | 5               | 6                  | 9              | 4               | 5                |
|       | 3    | 11.36              | 9        | 6                | 8       | 5               | 7                  | 10             | 6               | 10               |
|       | 23   | 11.32              | 3        | 12               | 11      | 3               | 9                  | 40             | 5               | 24               |
|       | 29   | 10.53              | 15       | 3                | 0       | 13              | 8                  | 3              | 7               | 49               |
|       | 2    | 8.81               | 15       | 3                | 7       | 6               | 3                  | 5              | 9               | 9                |
|       | 27   | 8.69               | 8        | 7                | 5       | 8               | 10                 | 17             | 8               | 22               |
| $G_3$ | 19   | 6.66               | 16       | 2                | 12      | 2               | 1                  | 6              | 10              | 1                |
|       | 25   | 6.44               | 7        | 8                | 6       | 7               | 10                 | 19             | 10              | 13               |
|       | 7    | 6.37               | 5        | 10               | 3       | 10              | 14                 | 26             | 10              | 43               |
|       | 15   | 5.40               | 6        | 9                | 3       | 10              | 13                 | 27             | 11              | 34               |
|       | 4    | 5.28               | 4        | 11               | 6       | 7               | 12                 | 18             | 12              | 14               |
|       | 17   | 4.66               | 9        | 6                | 10      | 4               | 5                  | 12             | 13              | 7                |
|       | 9    | 3.87               | 6        | 9                | 8       | 5               | 9                  | 11             | 14              | 4                |
|       | 28   | 3.74               | 0        | 15               | 6       | 7               | 16                 | 62             | 14              | 49               |
|       | 12   | 3.67               | 7        | 8                | 5       | 8               | 11                 | 22             | 14              | 18               |
|       | 37   | 3.60               | 13       | 4                | 1       | 12              | 9                  | 1              | 14              | 30               |
|       | 14   | 3.15               | 3        | 12               | 5       | 8               | 14                 | 46             | 15              | 25               |
|       | 82   | 3.15               | 0        | 15               | 6       | 7               | 16                 | 62             | 15              | 49               |
|       | 59   | 2.82               | 9        | 6                | 6       | 7               | 8                  | 13             | 17              | 3                |
|       | 61   | 2.74               | 4        | 11               | 3       | 10              | 15                 | 32             | 16              | 26               |
|       | 8    | 2.70               | 5        | 10               | 3       | 10              | 14                 | 24             | 16              | 11               |
|       | 38   | 2.70               | 3        | 12               | 3       | 10              | 16                 | 35             | 16              | 38               |
|       | 5    | 2.25               | 8        | 7                | 0       | 13              | 14                 | 8              | 17              | 49               |
| 76    | 2.25 | 0                  | 15       | 6                | 7       | 16              | 62                 | 17             | 49              |                  |
| 77    | 2.25 | 0                  | 15       | 6                | 7       | 16              | 62                 | 17             | 49              |                  |
| 64    | 1.92 | 8                  | 7        | 4                | 9       | 11              | 25                 | 19             | 19              |                  |
