# Supplementary material for: Identification of Important Nodes in Directed Biological Networks: A Network Motif Approach
Source: PubMed Central journal article supplement (PMC4149525; doi:10.1371/journal.pone.0106132), 2014-08-29
Supplement: pone.0106132.s002.pdf [file pone.0106132.s002.pdf]

**Table S2: Clusters, members, rankings and statistical characteristics of the identified top-30 ranked nodes in the HST.**

| Group     | Node        | $I^{\text{score}}$ | Out-deg. | $R_{\text{out}}$ | In-deg. | $R_{\text{in}}$ | $R_{\text{total}}$ | $R_{\text{p}}$ | $R_{\text{mc}}$ | $R_{\text{bet}}$ |
|-----------|-------------|--------------------|----------|------------------|---------|-----------------|--------------------|----------------|-----------------|------------------|
| $G_1$     | 120: MKK4   | 249.37             | 5        | 6                | 12      | 1               | 2                  | 25             | -               | 6                |
| $G_2$     | 65:ERK      | 150.31             | 12       | 1                | 10      | 2               | 1                  | 5              | -               | 5                |
|           | 123:MKK7    | 179.63             | 3        | 8                | 12      | 1               | 4                  | 50             | -               | 8                |
| $G_3$     | 129:ASK1    | 114.55             | 6        | 5                | 5       | 6               | 6                  | 21             | -               | 3                |
|           | 121:MKK5    | 106.32             | 9        | 2                | 7       | 4               | 3                  | 10             | -               | 11               |
|           | 40:JNK      | 97.49              | 6        | 5                | 6       | 5               | 5                  | 38             | -               | 9                |
|           | 113:JNK3    | 94.40              | 6        | 5                | 5       | 6               | 6                  | 38             | -               | 12               |
|           | 116:JNK2    | 94.40              | 6        | 5                | 5       | 6               | 6                  | 38             | -               | 12               |
|           | 149:p38beta | 84.36              | 8        | 3                | 4       | 7               | 5                  | 19             | -               | 19               |
| $G_4$     | 109:MSK2    | 59.39              | 3        | 8                | 4       | 7               | 9                  | 69             | -               | 28               |
|           | 64:ERK1     | 57.87              | 6        | 5                | 6       | 5               | 5                  | 26             | -               | 17               |
|           | 118:MKK2    | 47.15              | 2        | 9                | 4       | 7               | 10                 | 62             | -               | 15               |
|           | 212:TAK1    | 46.36              | 4        | 7                | 2       | 9               | 10                 | 32             | -               | 21               |
|           | 196:SHC     | 43.10              | 2        | 9                | 6       | 5               | 8                  | 22             | -               | 4                |
|           | 108:MSK1    | 40.92              | 3        | 8                | 3       | 8               | 10                 | 69             | -               | 40               |
|           | 24:B-Raf    | 37.60              | 3        | 8                | 2       | 9               | 11                 | 44             | -               | 7                |
|           | 119:MKK3    | 36.33              | 3        | 8                | 2       | 9               | 11                 | 39             | -               | 22               |
|           | 128:MEKK4   | 35.13              | 2        | 9                | 3       | 8               | 11                 | 83             | -               | 39               |
|           | 111:MNK1    | 34.38              | 1        | 10               | 4       | 7               | 11                 | 89             | -               | 49               |
|           | 112:MNK2    | 34.38              | 1        | 10               | 4       | 7               | 11                 | 89             | -               | 49               |
|           | 14:ATF2     | 33.00              | 0        | 11               | 3       | 8               | 13                 | 92             | -               | 71               |
|           | 142:NFAT4   | 33.00              | 0        | 11               | 3       | 8               | 13                 | 92             | -               | 71               |
|           | 189:RNPk    | 33.00              | 0        | 11               | 3       | 8               | 13                 | 92             | -               | 71               |
|           | 221: p53    | 33.00              | 0        | 11               | 3       | 8               | 13                 | 92             | -               | 71               |
|           | 224: c-JUN  | 33.00              | 0        | 11               | 3       | 8               | 13                 | 92             | -               | 71               |
|           | 126:MEKK2   | 31.87              | 3        | 8                | 1       | 10              | 12                 | 61             | -               | 38               |
| 127:MEKK3 | 31.87       | 3                  | 8        | 1                | 10      | 12              | 61                 | -              | 38              |                  |
| 131:MLK1  | 31.77       | 2                  | 9        | 2                | 9       | 12              | 83                 | -              | 61              |                  |
| 132:MLK2  | 31.77       | 2                  | 9        | 2                | 9       | 12              | 83                 | -              | 61              |                  |
| 133:MLK3  | 31.77       | 2                  | 9        | 2                | 9       | 12              | 83                 | -              | 61              |                  |
